# Supplementary material for: High Urinary Tungsten Concentration Is Associated with Stroke in the National Health and Nutrition Examination Survey 1999–2010
Source: PLoS One. 2013 Nov 11;8(11):e77546. doi: 10.1371/journal.pone.0077546 (PMC3823878; doi:10.1371/journal.pone.0077546)
Supplement: Table S2 — Odds Ratios and 95% confidence intervals representing the odds of a stroke diagnosis per 1 unit increase in urinary tungsten adjusting for creatinine in the model for NHANES participants less than 75 years of age or less than 50 years of age. (DOCX) [file pone.0077546.s002.docx]

|  | **Age Range in NHANES Included** | | | |
| --- | --- | --- | --- | --- |
|  | **18-74 years** | | **18-49 years** | |
| **Model** | **Stroke Cases**  **(Controls)** | **Odds ratio** | **Stroke Cases**  **(Controls)** | **Odds ratio** |
| Crude | 203  (7,902) | 1.57 (1.17-2.12)** | 46  (4,801) | 1.95 (1.32-2.88)** |
| Adjusteda | 64  (3,799) | 1.95 (1.45-2.63)*** | 25  (2,481) | 2.43 (1.70-3.48)*** |
| Adjustedb | 69  (4,084) | 1.94 (1.44-2.62)*** | 28  (2,634) | 2.42 (1.69-3.47)*** |

Table S2: Odds Ratios and 95% confidence intervals representing the odds of a stroke diagnosis per 1 unit increase in urinary tungsten adjusting for creatinine in the model for NHANES participants less than 75 years of age or less than 50 years of age.

aThe adjusted models include age, sex, ethnicity, SES, smoking, occupation, BMI, hypertenstion, hypercholesterolemia, molybdenum and cobalt concentration as covariates. b In this model all urinary tungsten measures were included, including the 503 individuals with a concentration below the lowest detectable limit. Statistical significance is denoted by *, ** and ** representing *P*<0.05, *P*<0.01 and *P*<0.001 respectively.
